# Supplementary material
Source: MDPI journal article supplement (https://www.mdpi.com/2077-0472/11/10/971)
Supplement: s1 [file s1]

Supporting Materials

Table S1 Frequency and amount of glucose addition.

| Incubation Time (Days) | Adding Frequency | Adding Amount (C, mg/kg) |
|------------------------|------------------|--------------------------|
| 0                      | first            | 40000                    |
| 15                     | second           | 2000                     |
| 30                     | third            | 2000                     |

**Table S2** Mineralization rates of available N fractions. SON, soluble organic nitrogen, MBN, microbial biomass nitrogen; HWDON, hot water extractable organic N.

| Available N Fractions                                                           | Mineralization Rate<br>(%) | References                                                                            |
|---------------------------------------------------------------------------------|----------------------------|---------------------------------------------------------------------------------------|
| mineral N<br>(NH <sub>4</sub> <sup>+</sup> -N, NO <sub>3</sub> <sup>-</sup> -N) | 100                        | /                                                                                     |
| SON                                                                             | 22-61                      | (Ge et al., 2010; Liang et al., 2015; Murphy et al., 2000; Zhong and Makeschin, 2003) |
| MBN                                                                             | 30-57                      | (Brookes et al., 1985; Dempster et al., 2012; Myrold, 1987; Sugihara et al., 2010)    |
| HWDON                                                                           | 11-48                      | (Curtin et al., 2020; Curtin et al., 2006; Körschens et al., 1990; Sha et al., 2013)  |

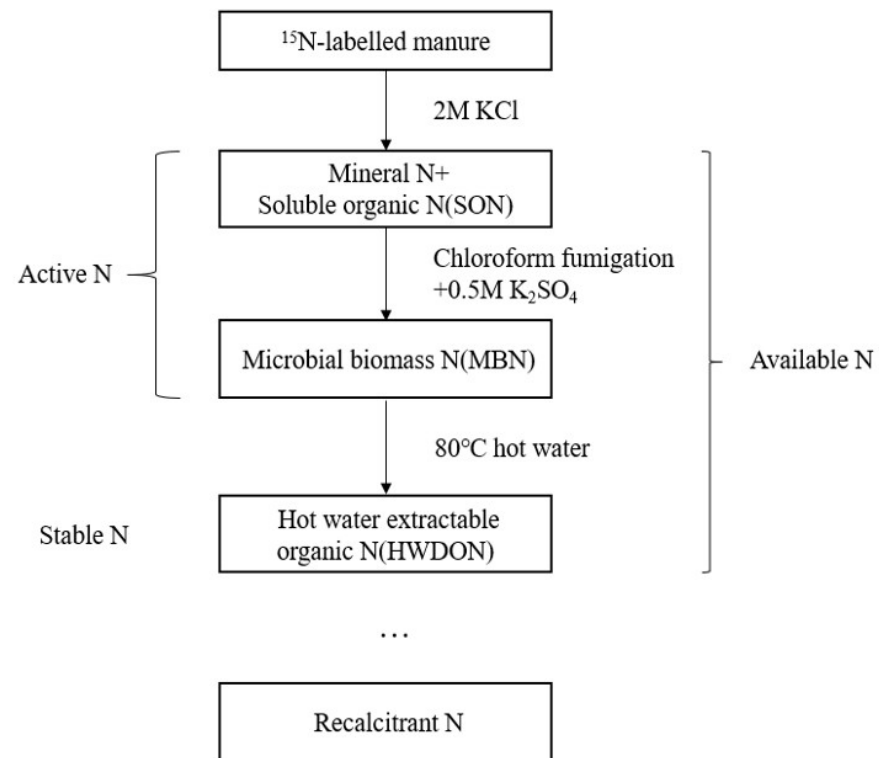

**Figure S1.** Sequentially extracting nitrogen fractions from  $^{15}\text{N}$ -labeled compost.
